# Supplementary material for: Dielectric properties of ultraviolet cured poly(dimethyl siloxane) sub-percolative composites containing percolative amounts of multi-walled carbon nanotubes
Source: Royal Society of Chemistry journal article supplement (doi:10.1039/c4ra14637a), 2015-01-01
Supplement: c4ra14637a1.pdf [file c4ra14637a1.pdf]

## Supplementary Information

Dielectric properties of ultraviolet cured poly(dimethyl siloxane) sub-percolative composites containing percolative amounts of multi-walled carbon nanotubes

K. Goswami, A.E. Daugaard and A.L. Skov\*

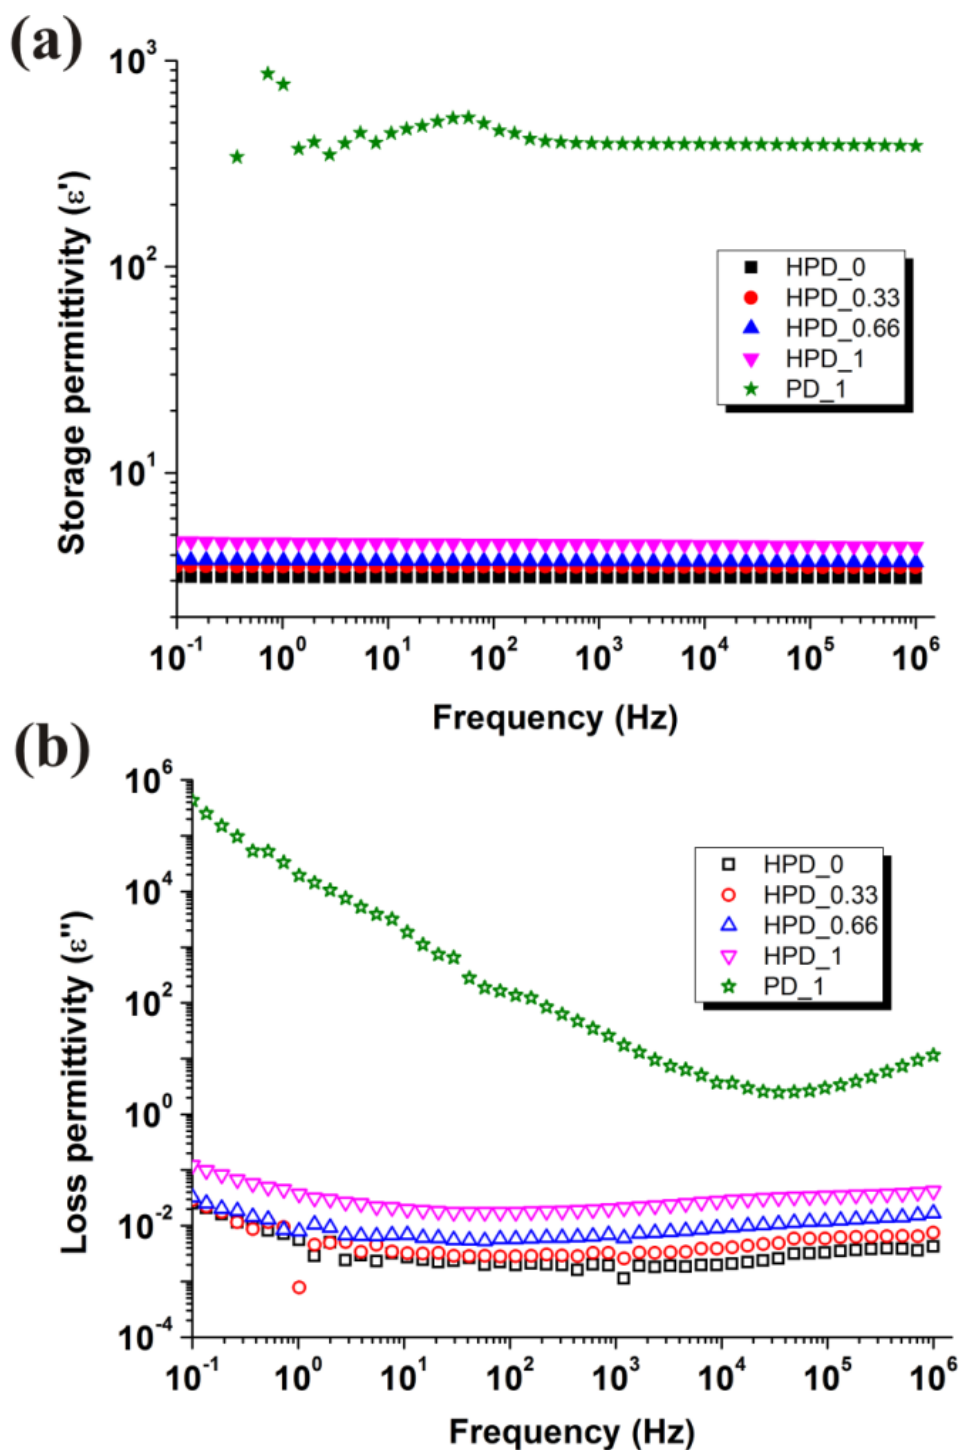

Figure 3 including the reference sample. Data are recorded at room temperature.
